# Supplementary material
Source: publisher figshare collection journal article supplement (https://acs.figshare.com/ndownloader/files/4516645)
Supplement: Supplementary file 1 [file 4516645]

# Bioactive Scalaranes from the Thai Sponge

## *Hyrtios gumminae*

*Chulabhorn Mahidol,<sup>†</sup> Hunsa Prawat,<sup>†\*</sup> Suwannee Sangpetsiripan<sup>†</sup> and Somsak Ruchirawat<sup>†‡</sup>*

Chulabhorn Research Institute, Vipavadee Rangsit Highway, Bangkok 10210, Thailand, Chulabhorn Graduate Institute and Center for Environmental Health, Toxicology and Management of Chemicals (ETM), Vipavadee Rangsit Highway, Bangkok 10210, Thailand

### Supporting Information

- Figure S1. <sup>1</sup>H NMR (600 MHz, CDCl<sub>3</sub>) of the Compound **1**
- Figure S2. <sup>13</sup>C NMR (150 MHz, CDCl<sub>3</sub>) of the Compound **1**
- Figure S3. <sup>1</sup>H NMR (600 MHz, CDCl<sub>3</sub>) of the Compound **2**
- Figure S4. <sup>13</sup>C NMR (150 MHz, CDCl<sub>3</sub>) of the Compound **2**
- Figure S5. <sup>1</sup>H NMR (600 MHz, CDCl<sub>3</sub>) of the Compound **2a**
- Figure S6. <sup>13</sup>C NMR (150 MHz, CDCl<sub>3</sub>) of the Compound **2a**
- Figure S7. <sup>1</sup>H NMR (600 MHz, CDCl<sub>3</sub>) of the Compound **2b**
- Figure S8. <sup>13</sup>C NMR (150 MHz, CDCl<sub>3</sub>) of the Compound **2b**
- Figure S9. HMBC (600 MHz, CDCl<sub>3</sub>) of the Compound **2b**
- Figure S10. <sup>1</sup>H NMR (400 MHz, CDCl<sub>3</sub>) of the Compound **3**
- Figure S11. <sup>13</sup>C NMR (100 MHz, CDCl<sub>3</sub>) of the Compound **3**
- Figure S12. <sup>1</sup>H NMR (600 MHz, CDCl<sub>3</sub>) of the Compound **3a**
- Figure S13. <sup>13</sup>C NMR (150 MHz, CDCl<sub>3</sub>) of the Compound **3a**

- Figure S14.  $^1\text{H}$  NMR (600 MHz,  $\text{CDCl}_3$ ) of the Compound **3b**
- Figure S15.  $^{13}\text{C}$  NMR (150 MHz,  $\text{CDCl}_3$ ) of the Compound **3b**
- Figure S16.  $^1\text{H}$  NMR (600 MHz, pyridine- $d_5$ ) of the Compound **4**
- Figure S17.  $^{13}\text{C}$  NMR (150 MHz, pyridine- $d_5$ ) of the Compound **4**
- Figure S18.  $^1\text{H}$  NMR (600 MHz,  $\text{CDCl}_3$ ) of the Compound **4a**
- Figure S19.  $^{13}\text{C}$  NMR (150 MHz,  $\text{CDCl}_3$ ) of the Compound **4a**
- Figure S20.  $^1\text{H}$  NMR (600 MHz,  $\text{CDCl}_3$ ) of the Compound **4b**
- Figure S21.  $^{13}\text{C}$  NMR (150 MHz,  $\text{CDCl}_3$ ) of the Compound **4b**

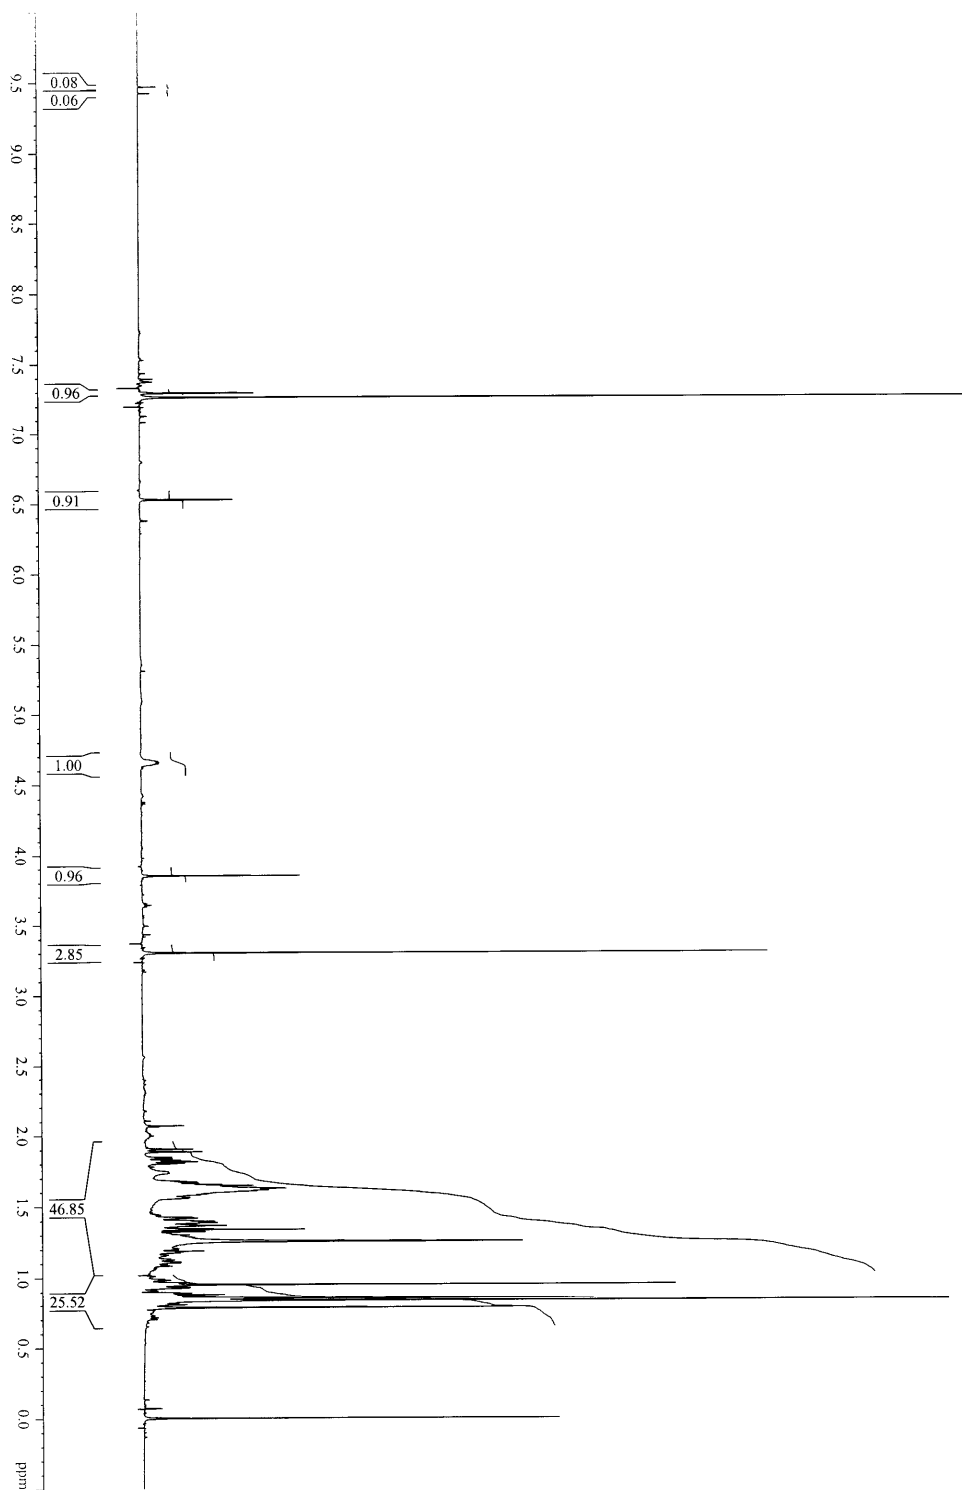

Figure S1.  $^1\text{H}$  NMR (600 MHz,  $\text{CDCl}_3$ ) of the Compound 1

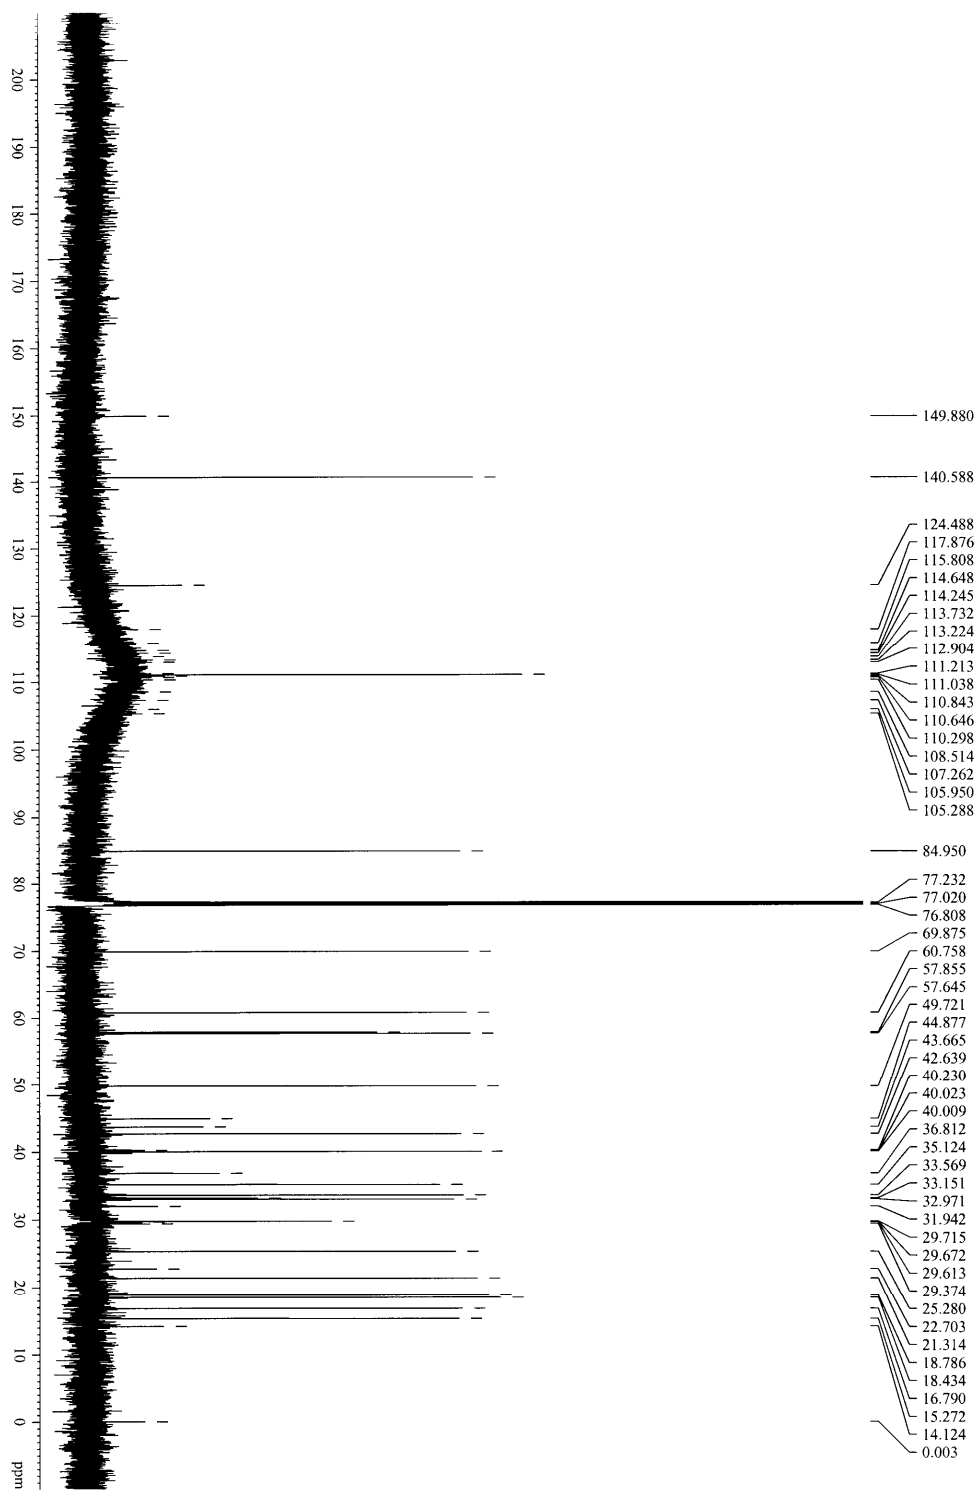

Figure S2.  $^{13}\text{C}$  NMR (150 MHz,  $\text{CDCl}_3$ ) of the Compound **1**

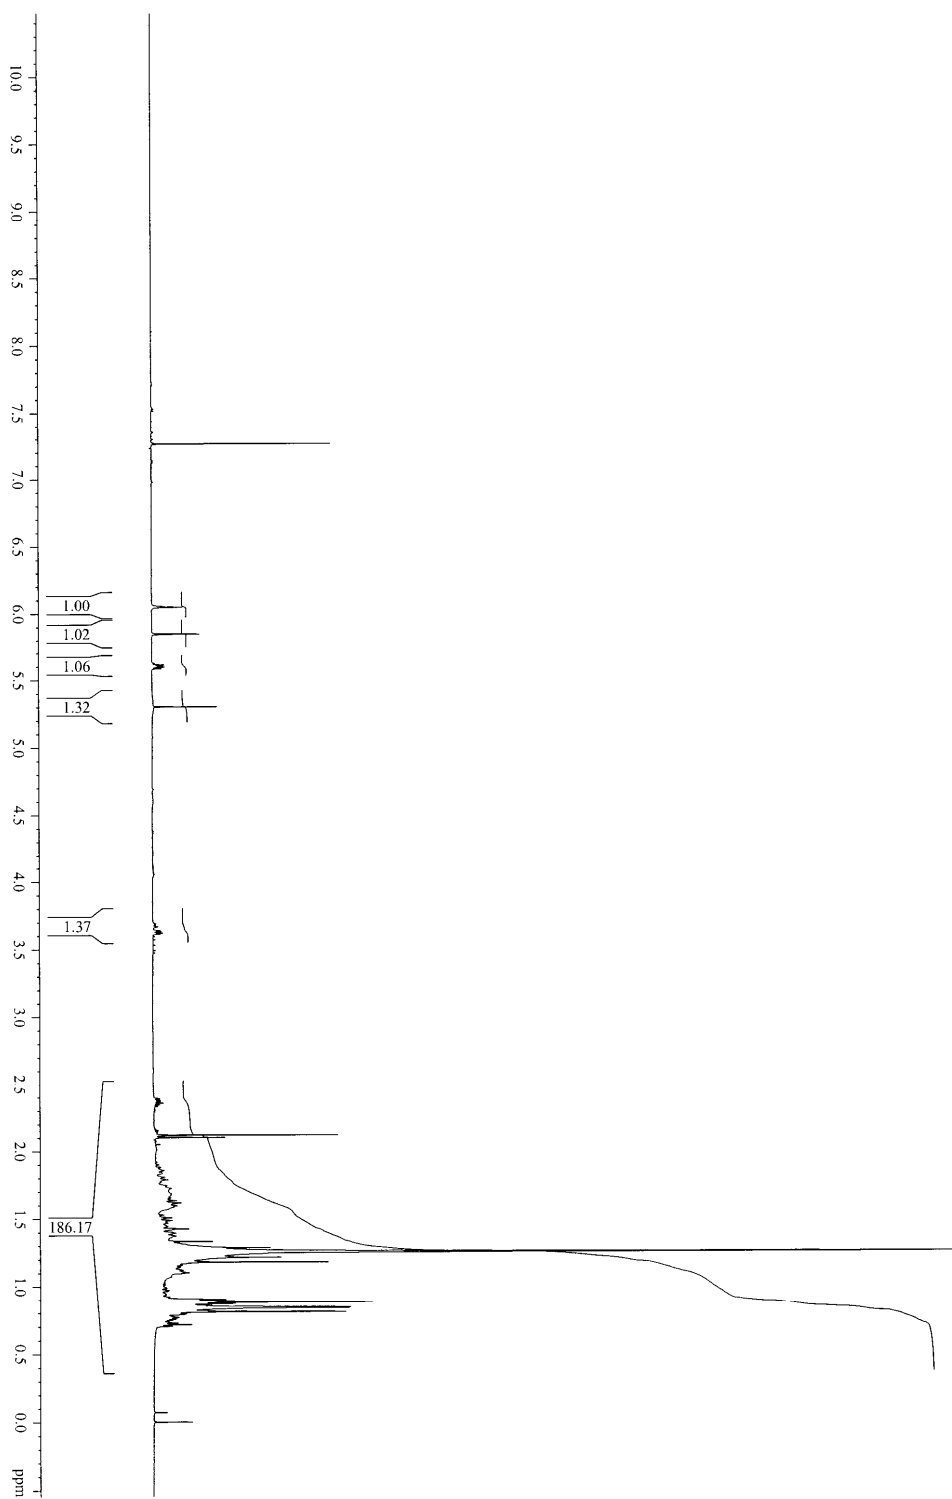

Figure S3.  $^1\text{H}$  NMR (600 MHz,  $\text{CDCl}_3$ ) of the Compound 2

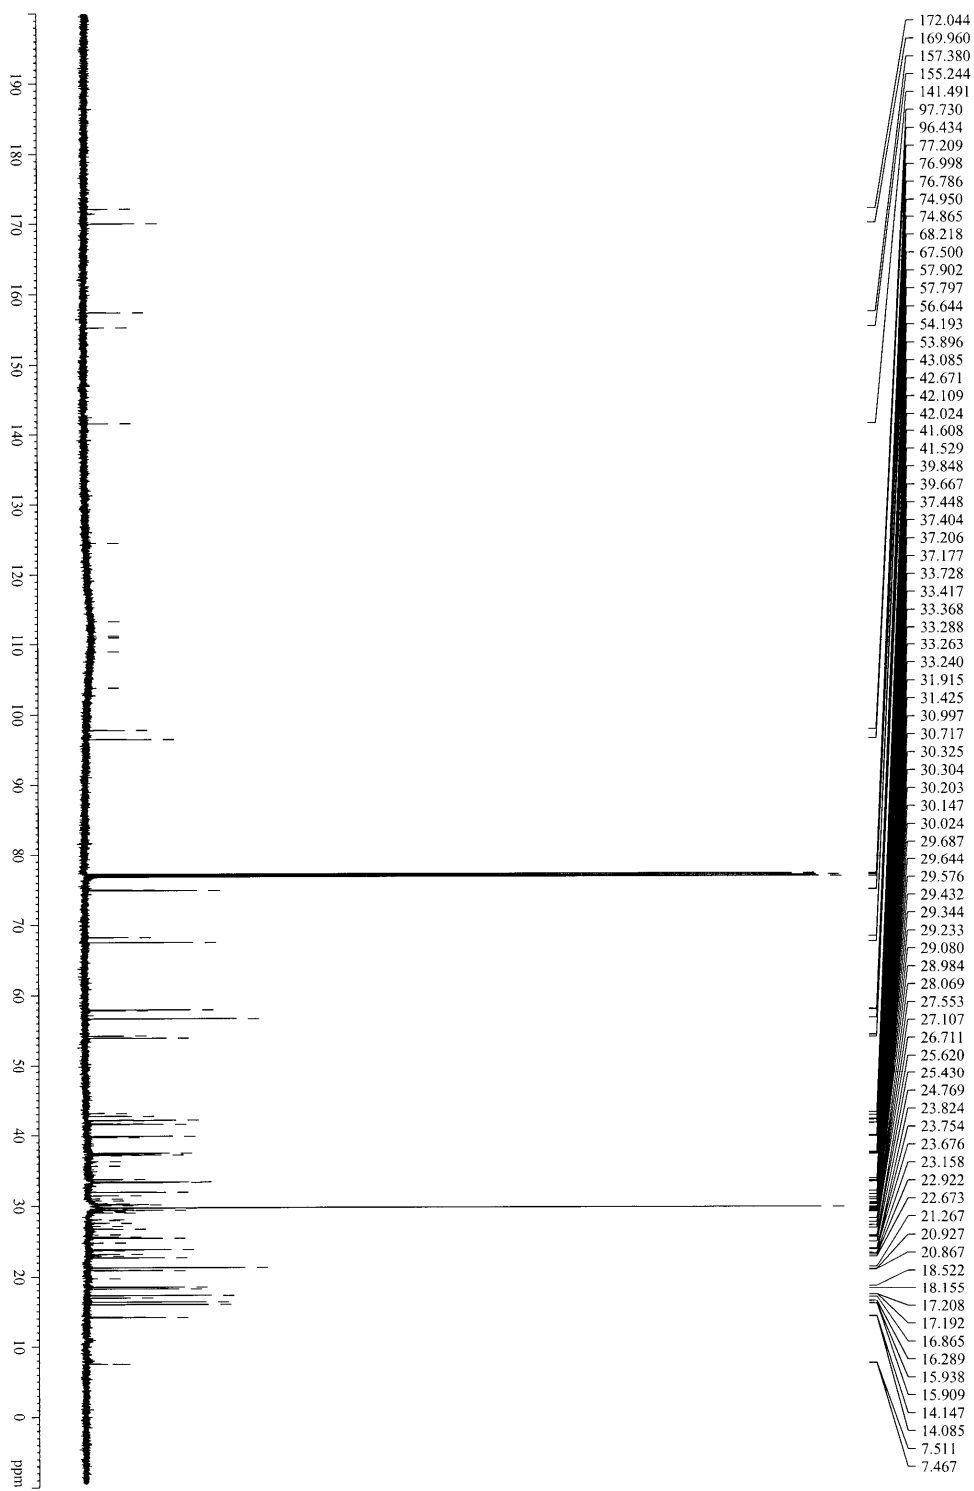

Figure S4.  $^{13}\text{C}$  NMR (150 MHz,  $\text{CDCl}_3$ ) of the Compound 2

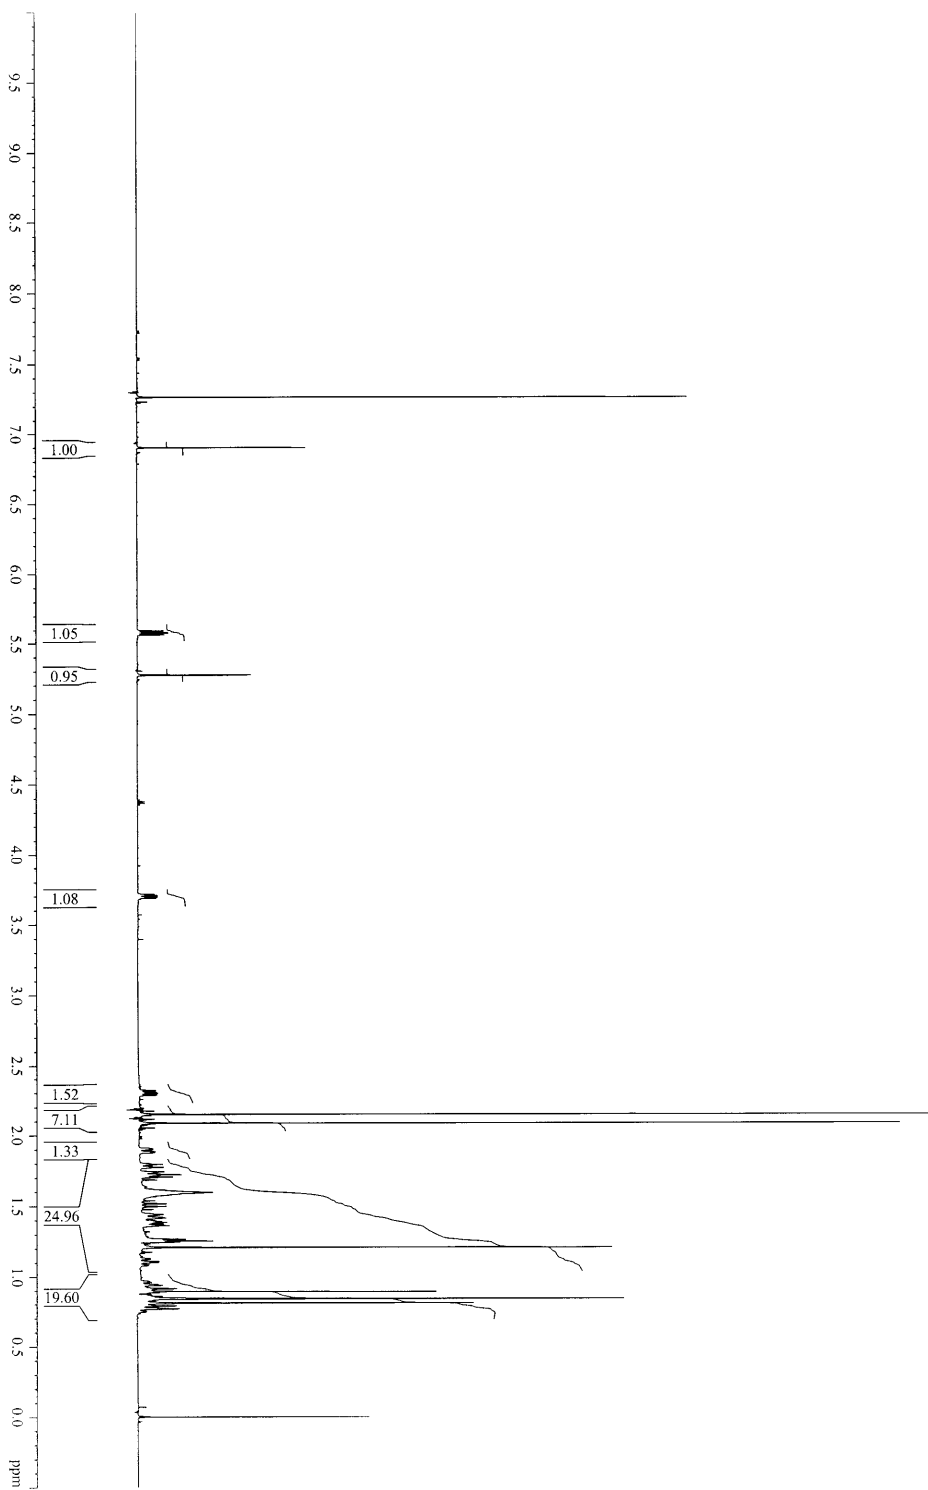

Figure S5.  $^1\text{H}$  NMR (600 MHz,  $\text{CDCl}_3$ ) of the Compound **2a**

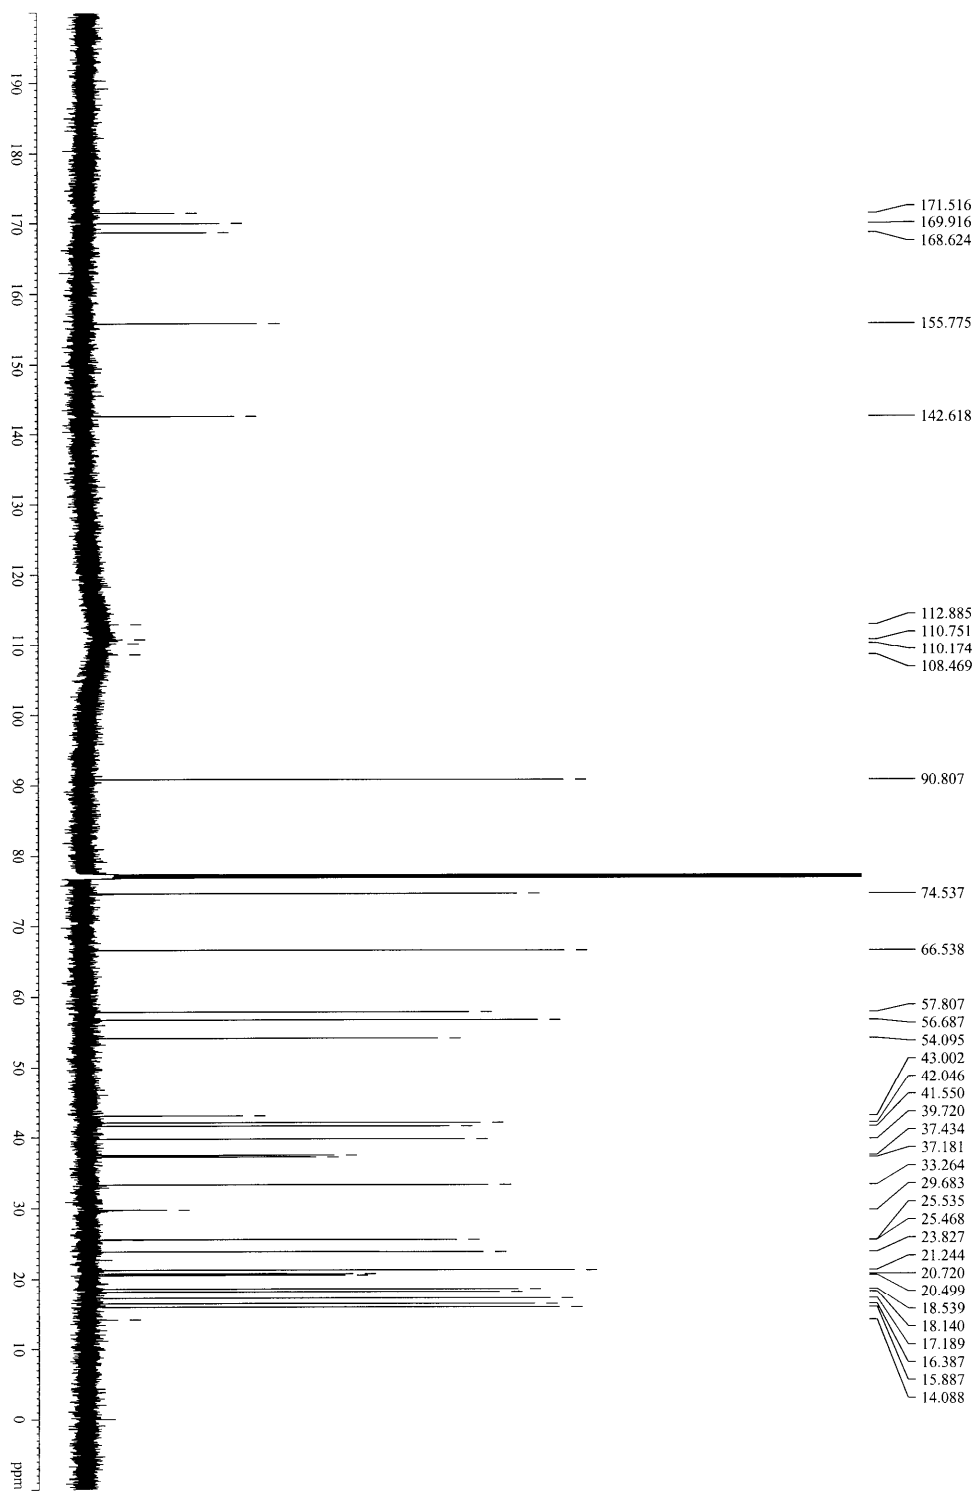

Figure S6.  $^{13}\text{C}$  NMR (150 MHz,  $\text{CDCl}_3$ ) of the Compound 2a



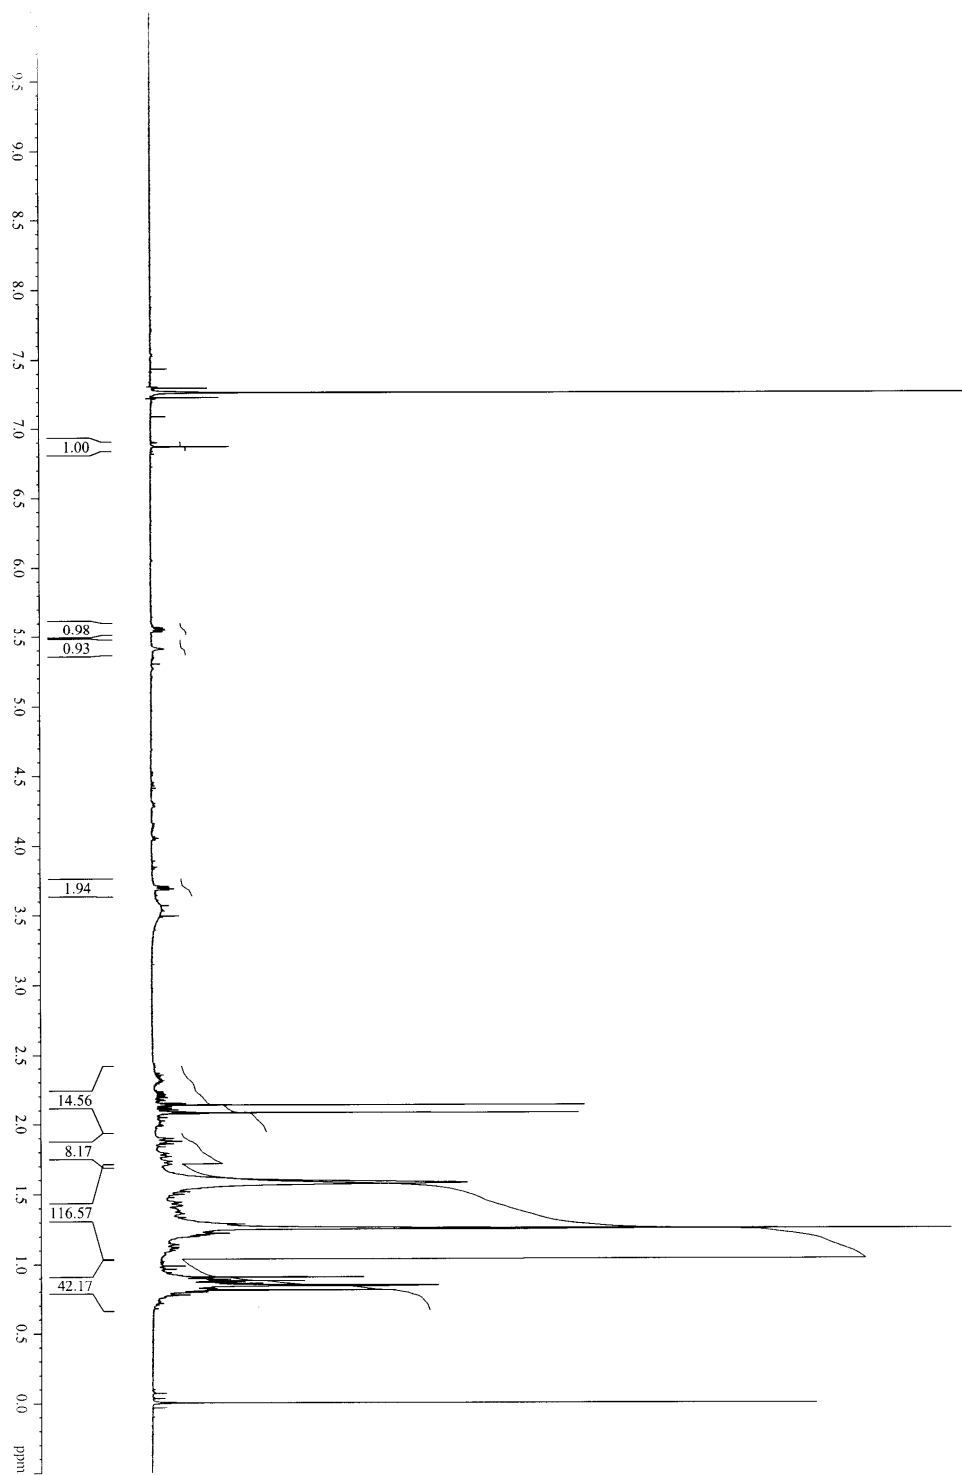

Figure S7.  $^1\text{H}$  NMR (600 MHz,  $\text{CDCl}_3$ ) of the Compound **2b**

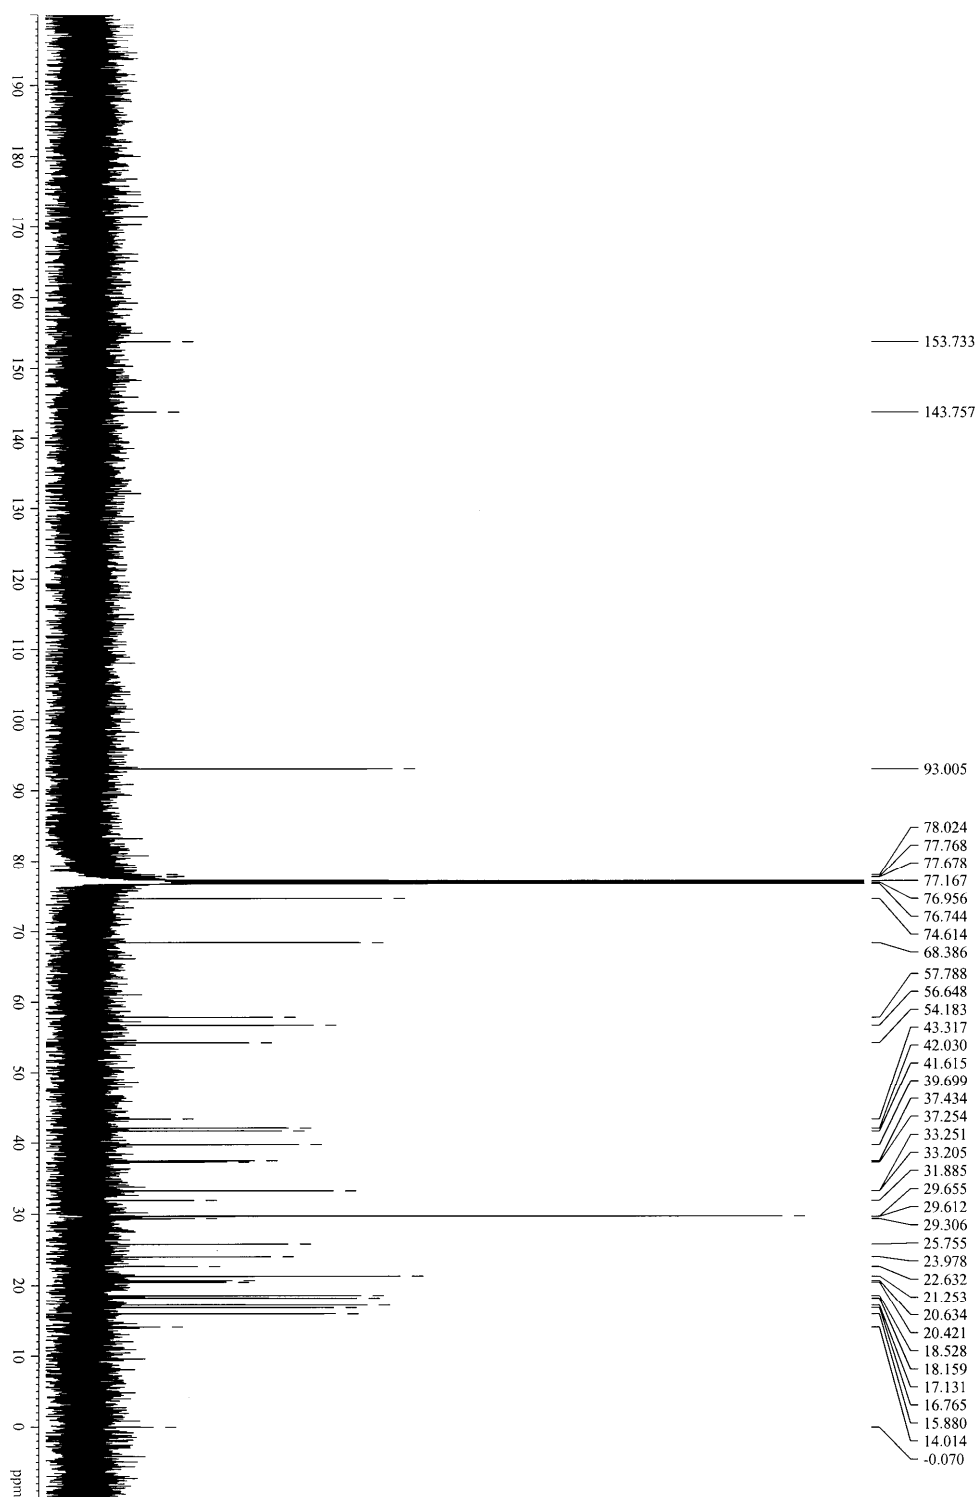

Figure S8.  $^{13}\text{C}$  NMR (150 MHz,  $\text{CDCl}_3$ ) of the Compound **2b**

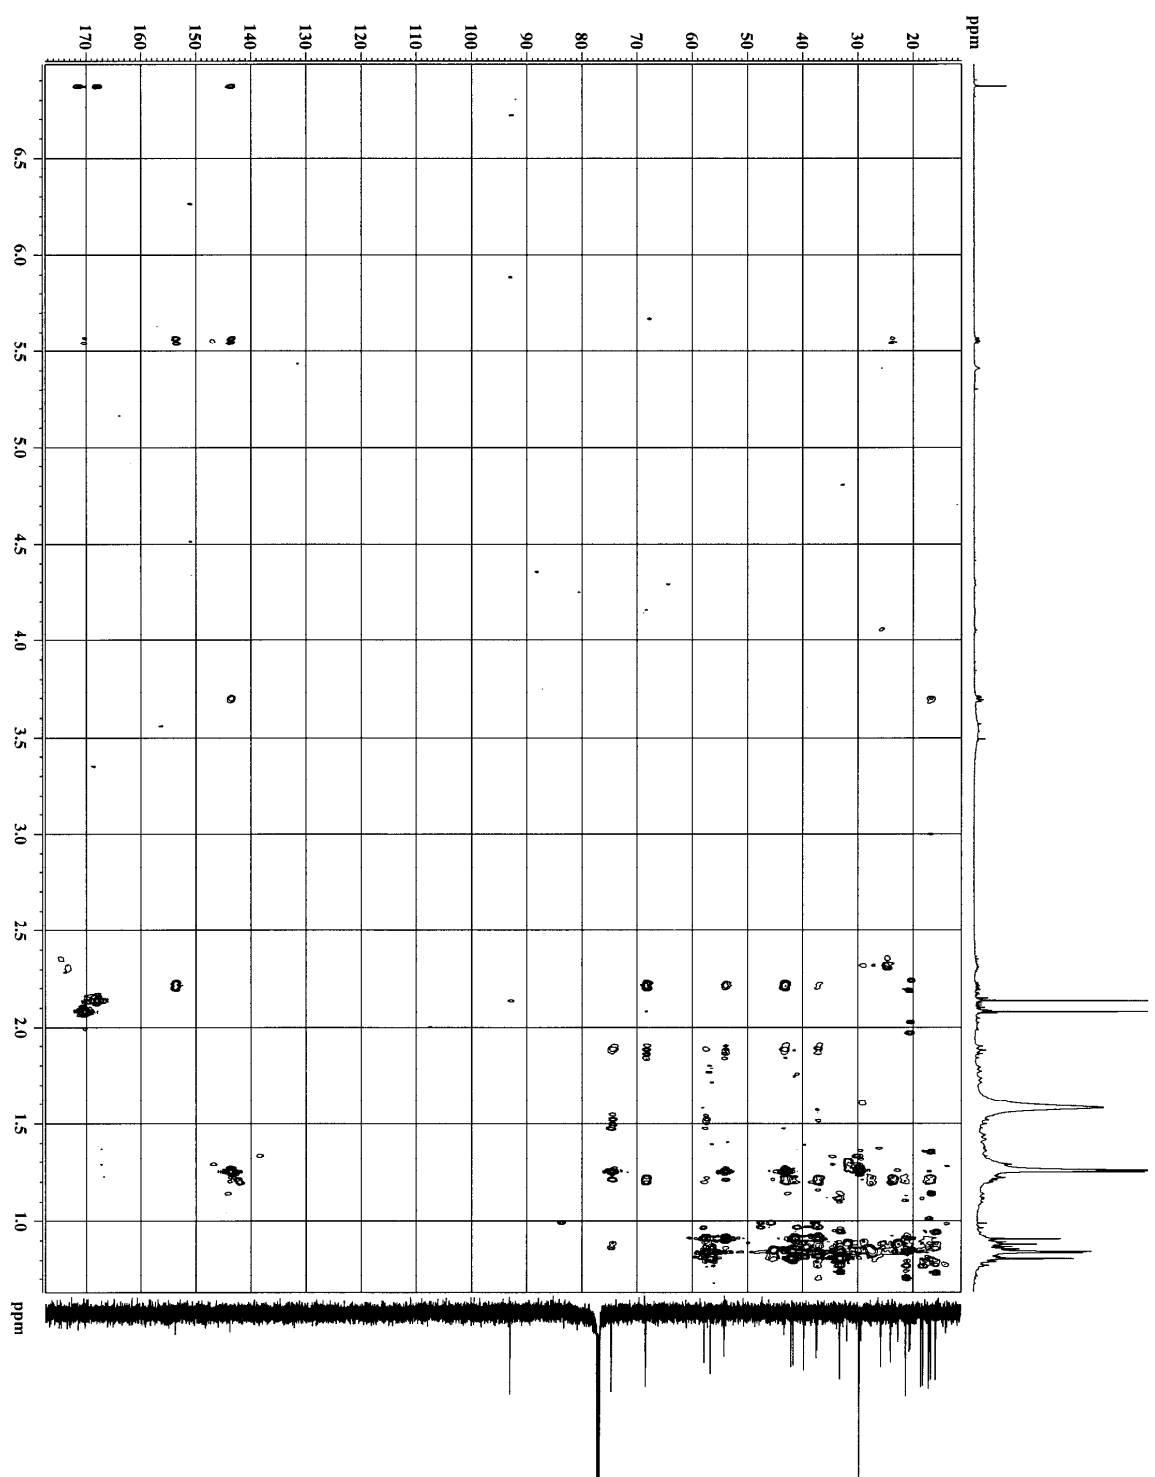

Figure S9. HMBC (600 MHz, CDCl<sub>3</sub>) of the Compound 2b

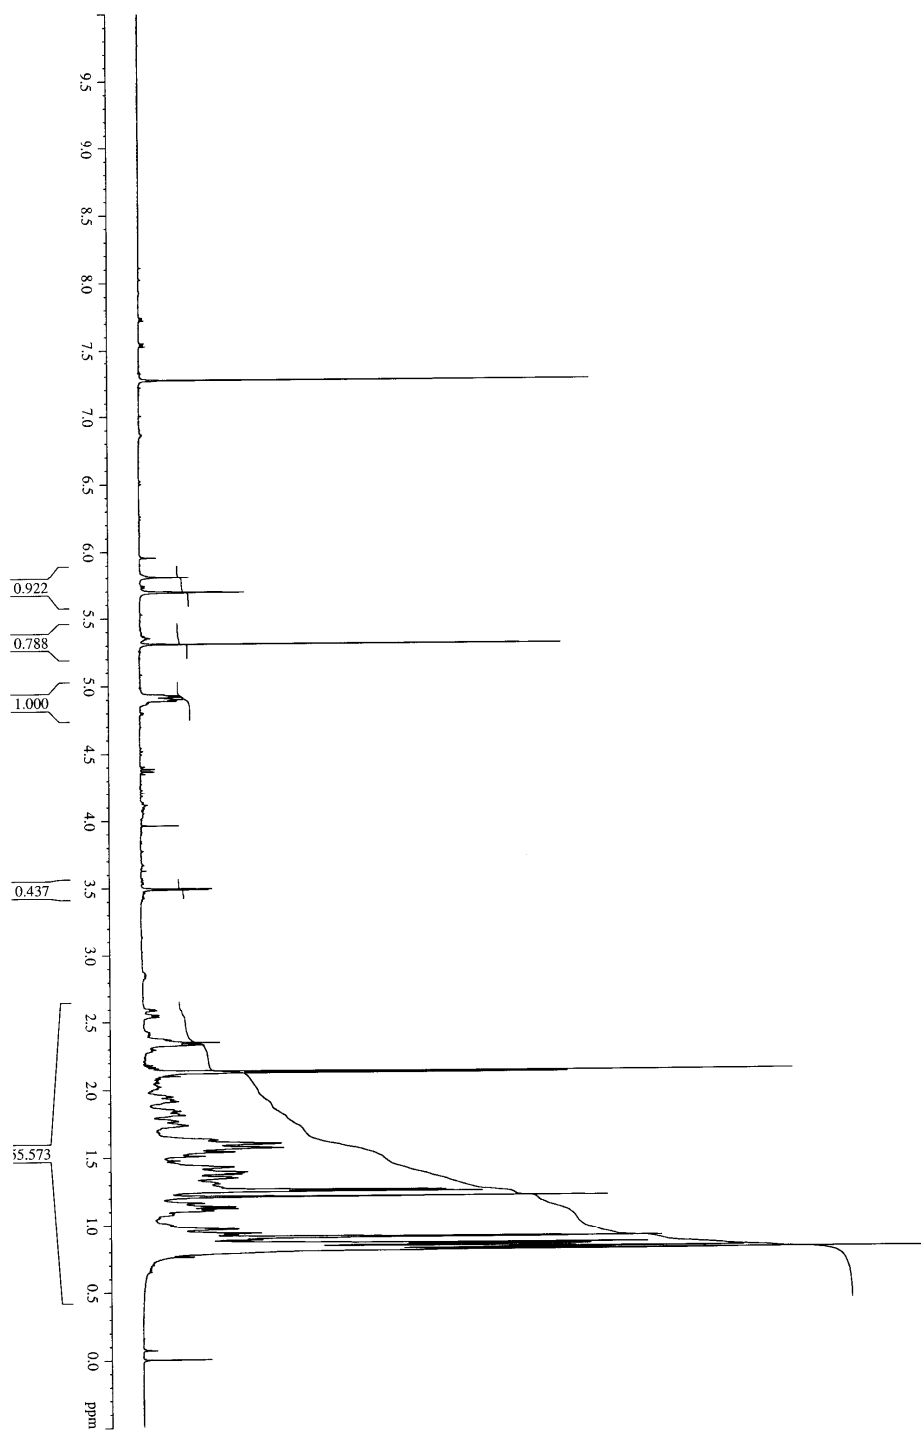

Figure S10.  $^1\text{H}$  NMR (400 MHz,  $\text{CDCl}_3$ ) of the Compound **3**

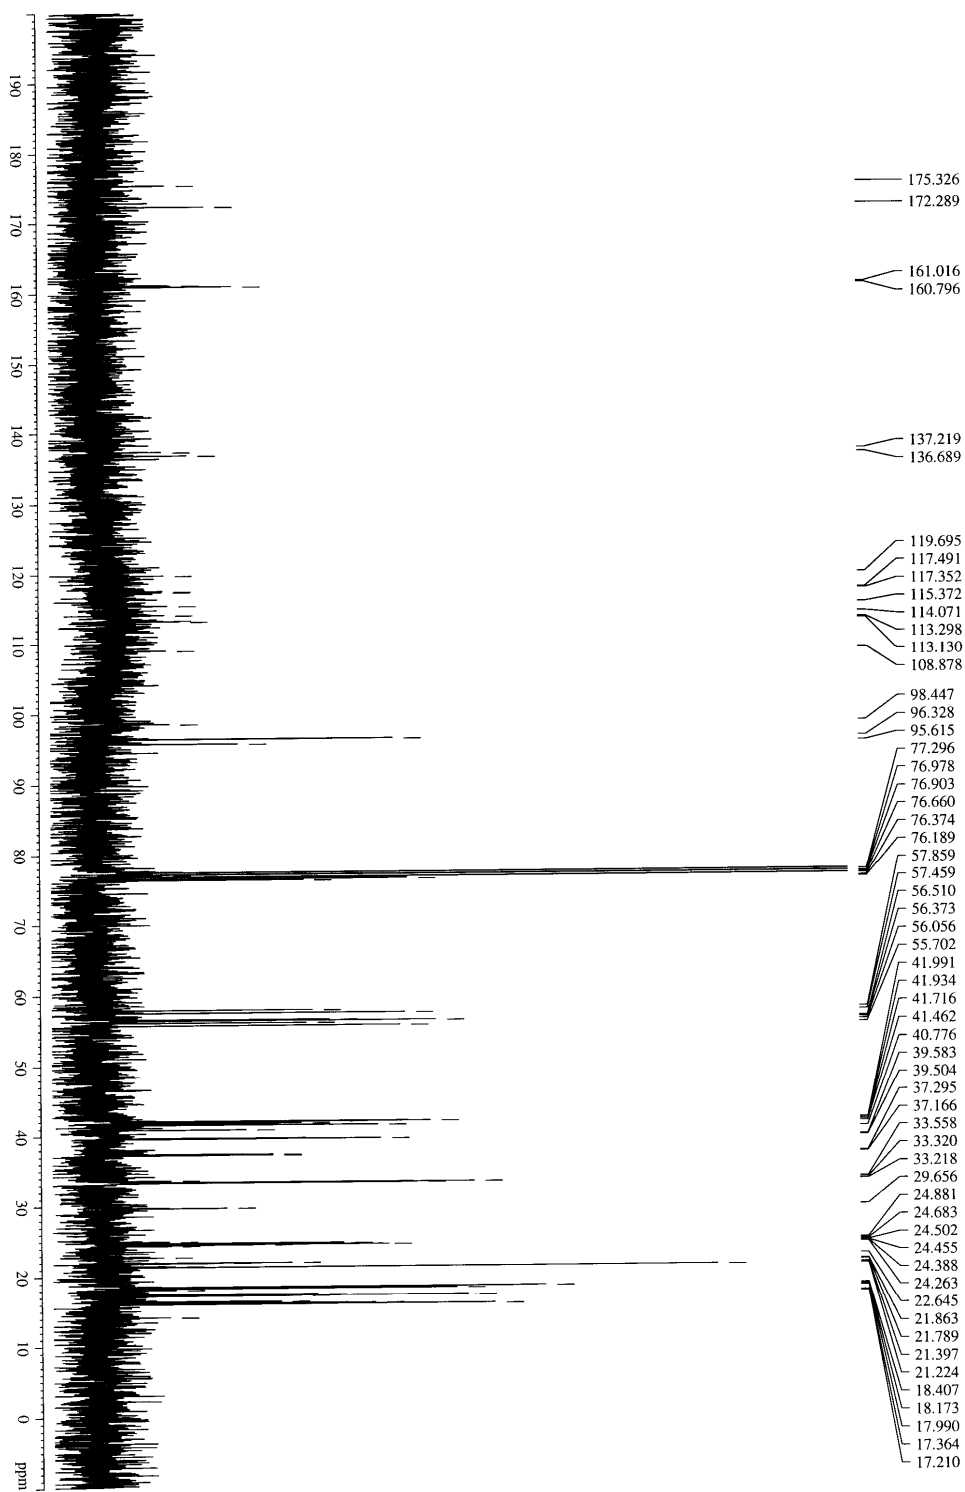

Figure S11.  $^{13}\text{C}$  NMR (100 MHz,  $\text{CDCl}_3$ ) of the Compound **3**

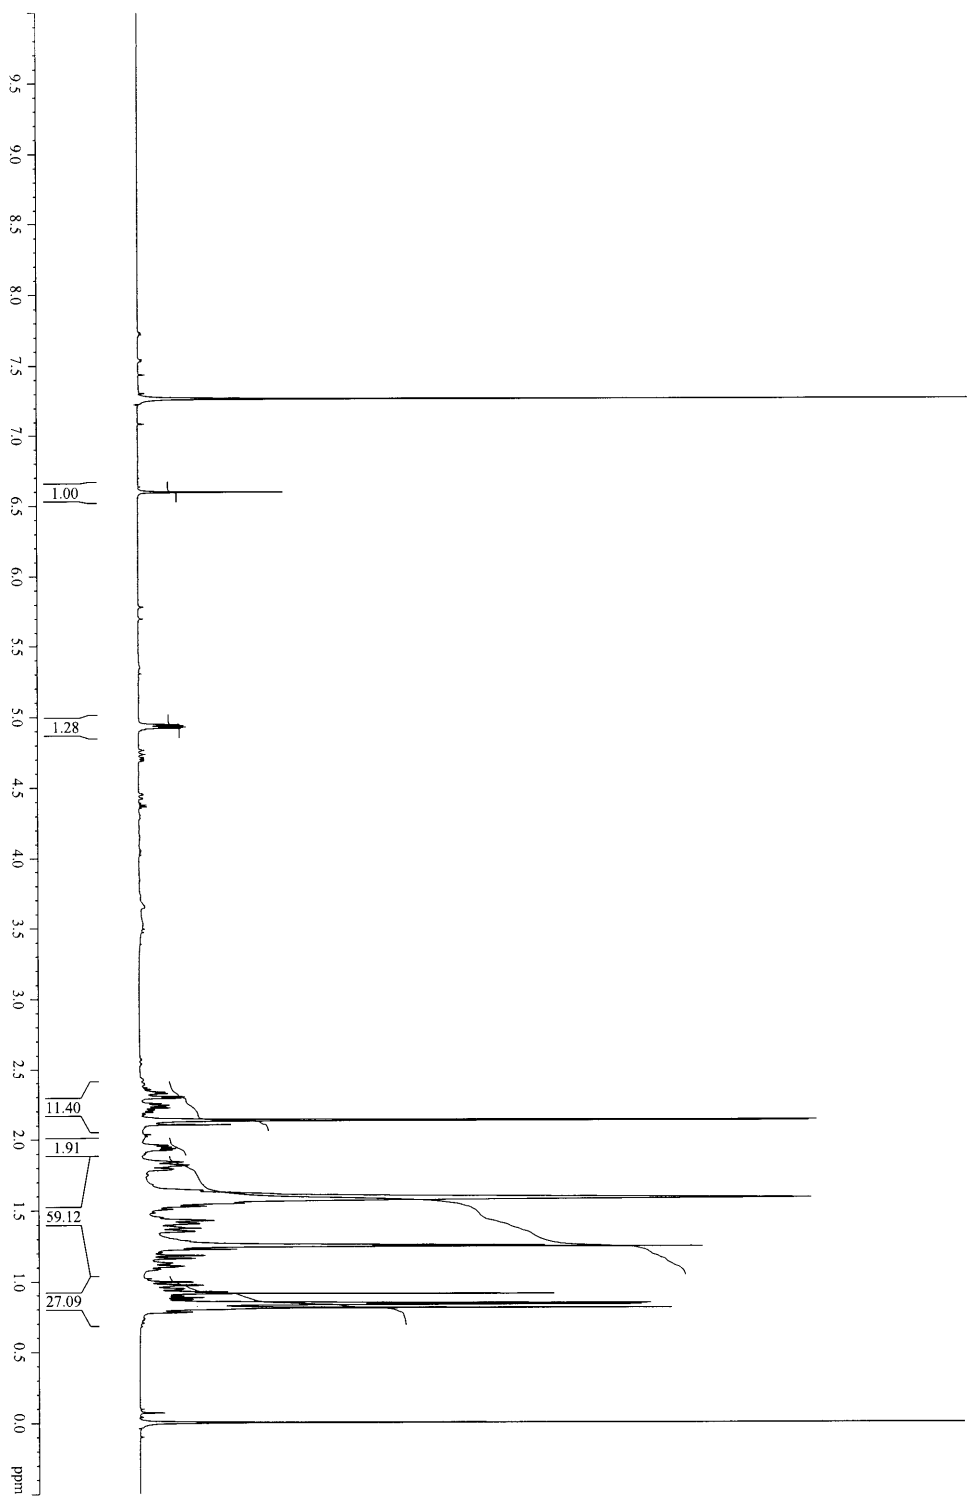

Figure S12.  $^1\text{H}$  NMR (600 MHz,  $\text{CDCl}_3$ ) of the Compound **3a**

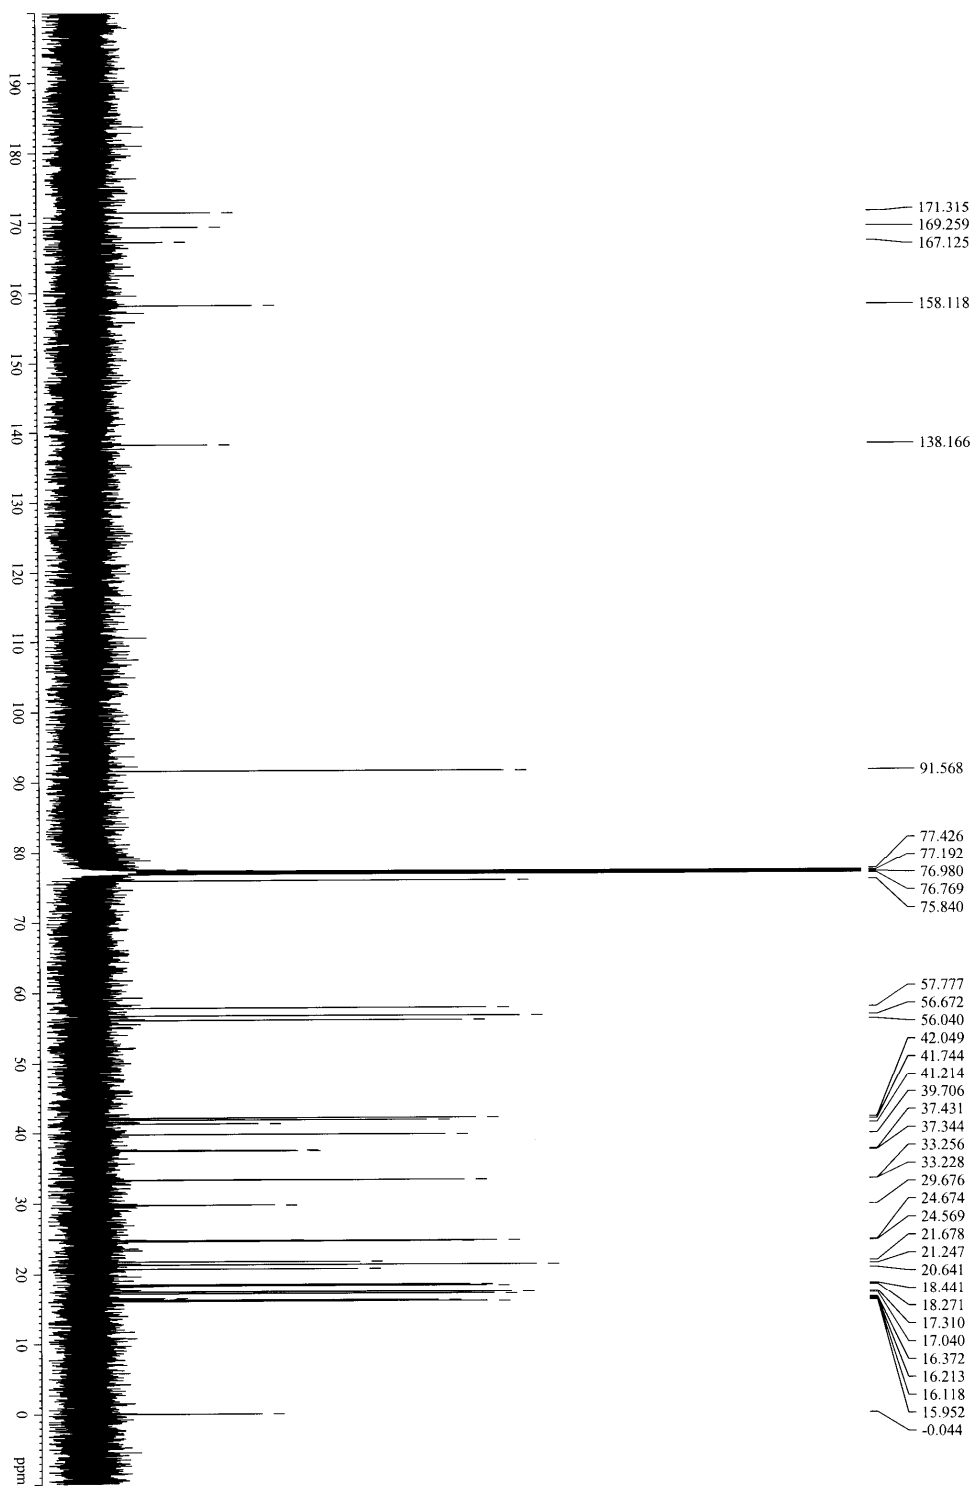

Figure S13. <sup>13</sup>C NMR (150 MHz, CDCl<sub>3</sub>) of the Compound **3a**

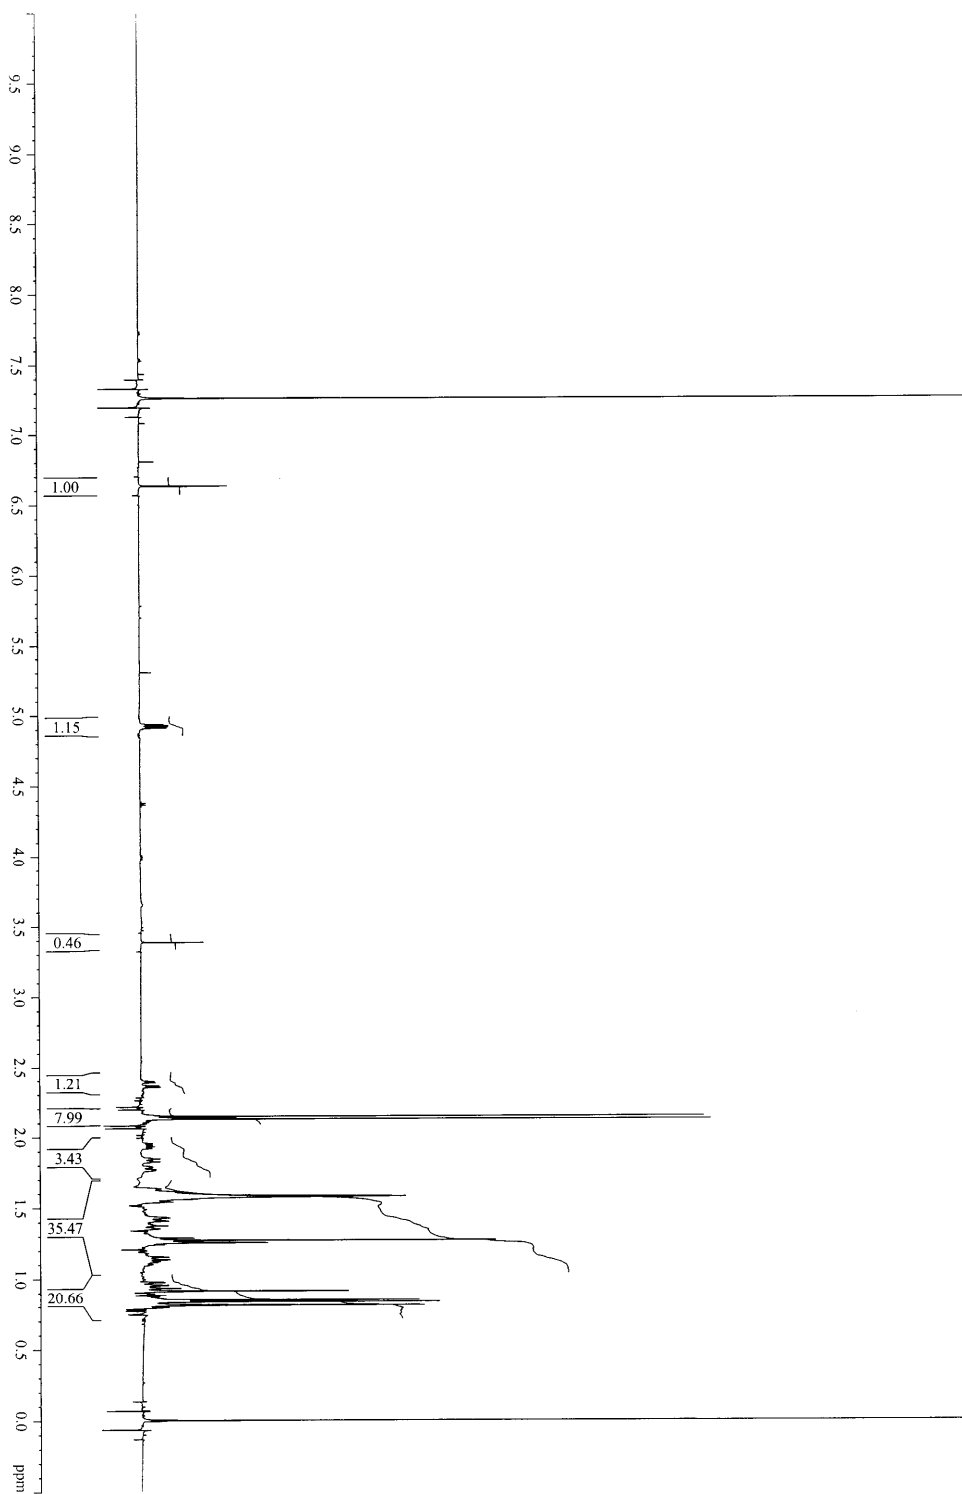

Figure S14.  $^1\text{H}$  NMR (600 MHz,  $\text{CDCl}_3$ ) of the Compound **3b**



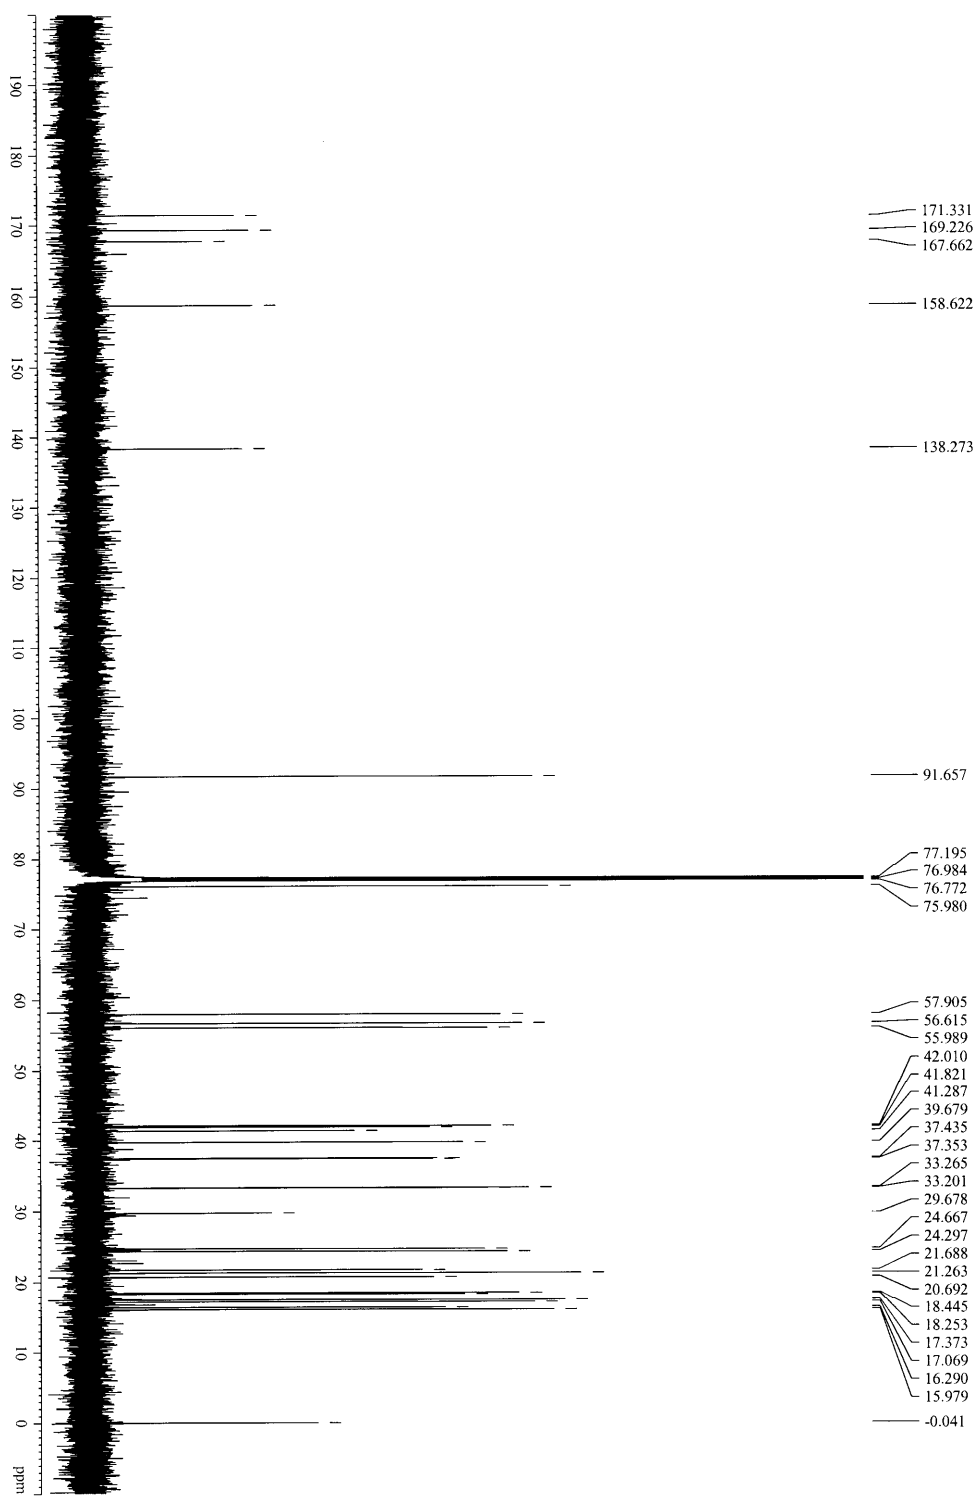

Figure S15.  $^{13}\text{C}$  NMR (150 MHz,  $\text{CDCl}_3$ ) of the Compound **3b**

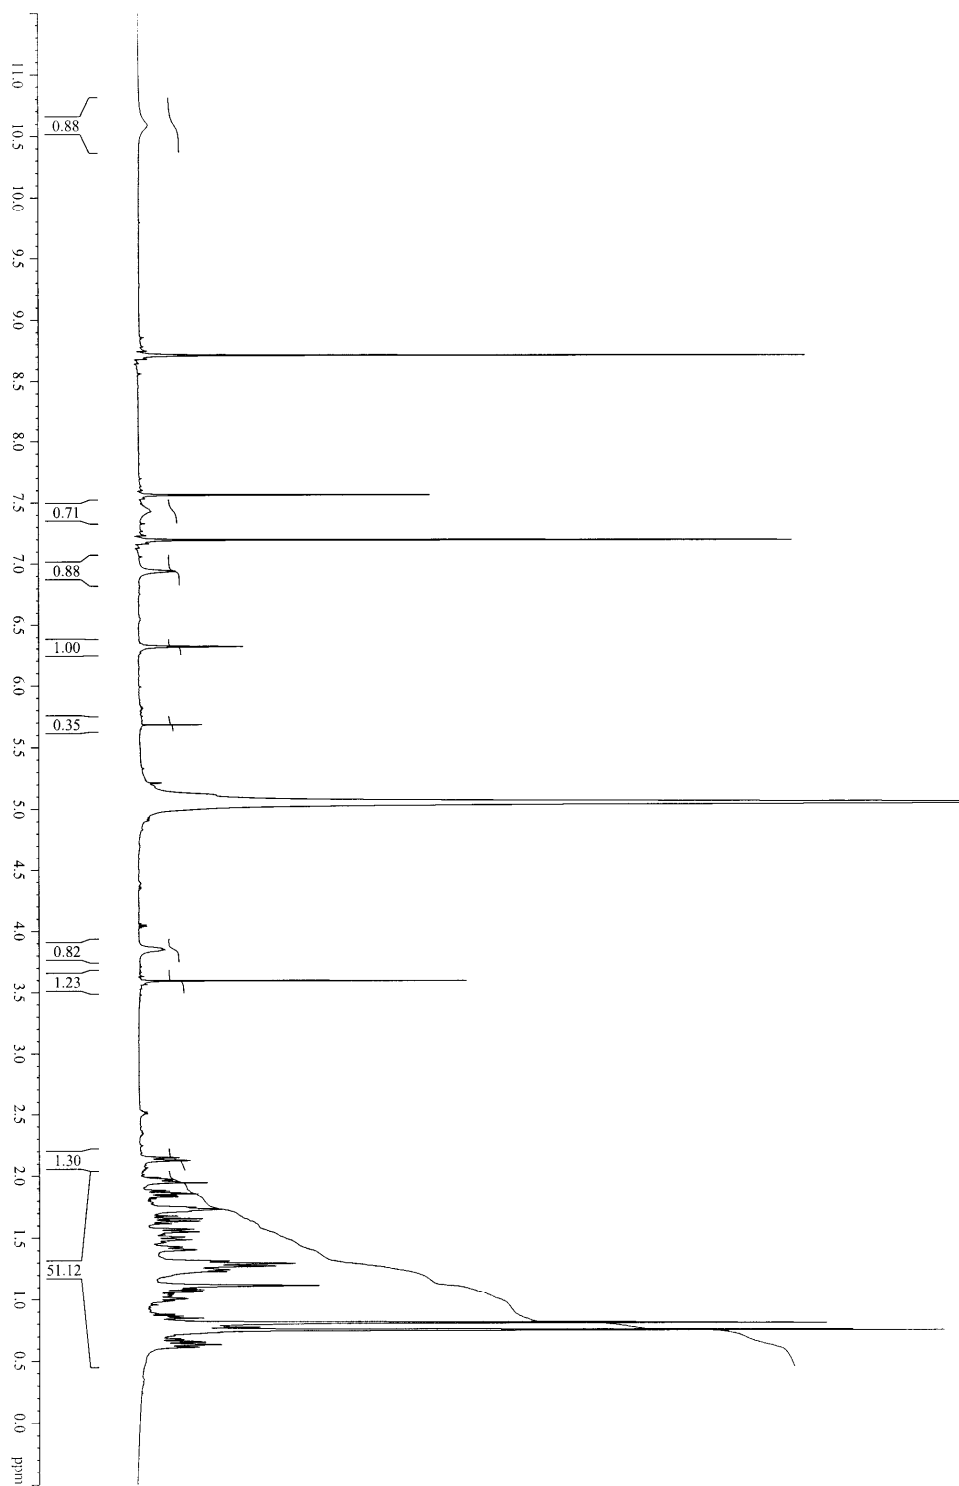

Figure S16.  $^1\text{H}$  NMR (600 MHz,  $\text{pyridine-d}_5$ ) of the Compound **4**

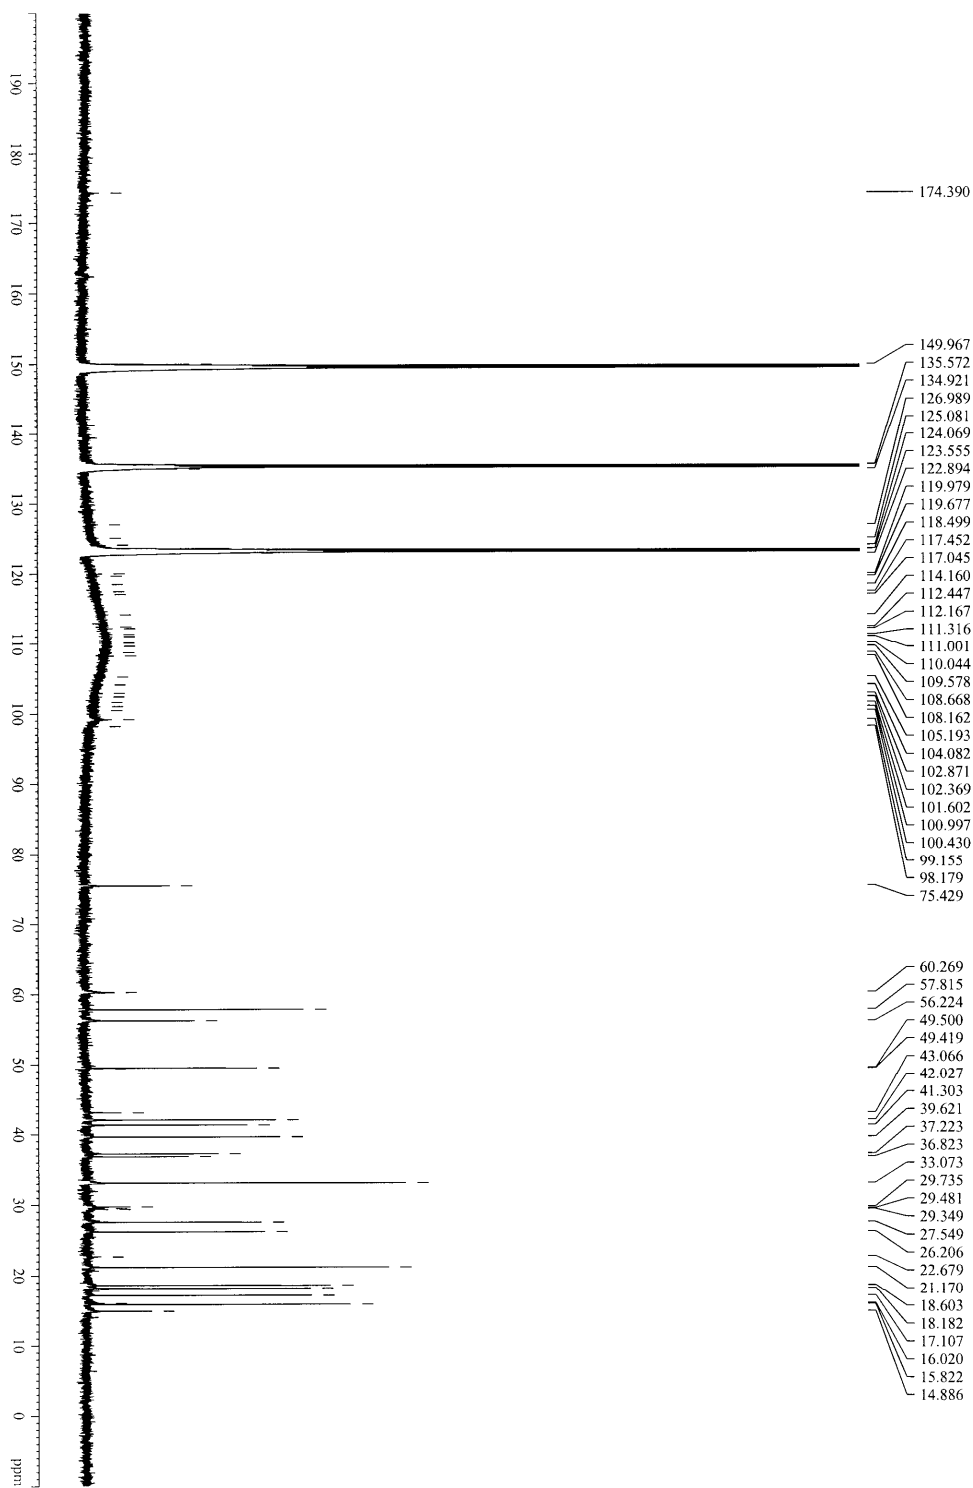

Figure S17.  $^{13}\text{C}$  NMR (150 MHz, pyridine- $d_5$ ) of the Compound 4

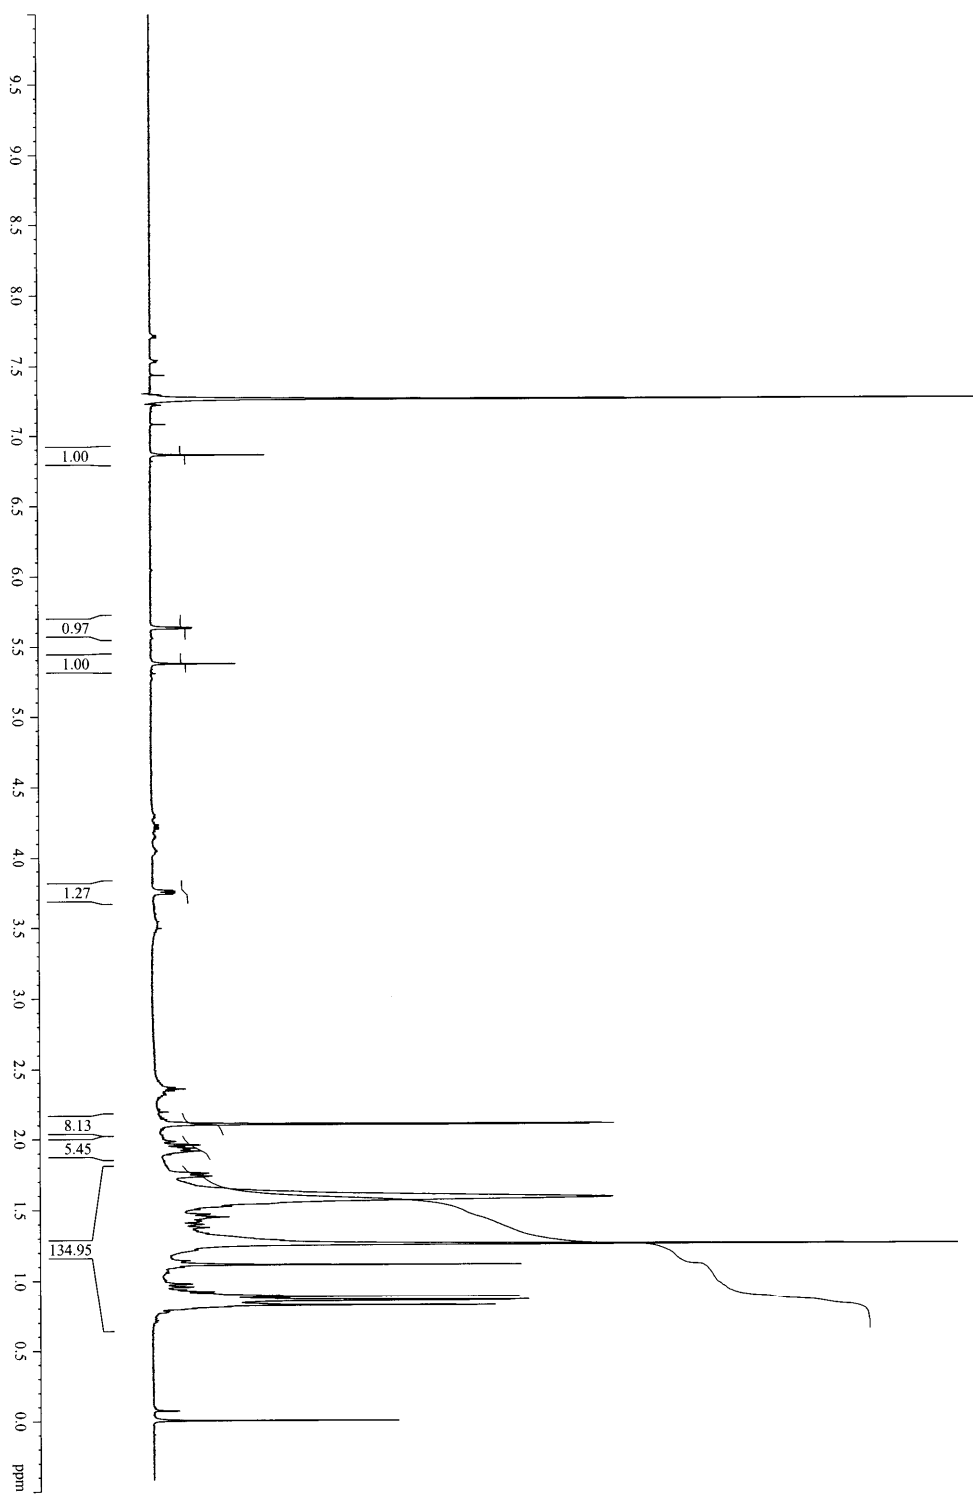

Figure S18.  $^1\text{H}$  NMR (600 MHz,  $\text{CDCl}_3$ ) of the Compound **4a**

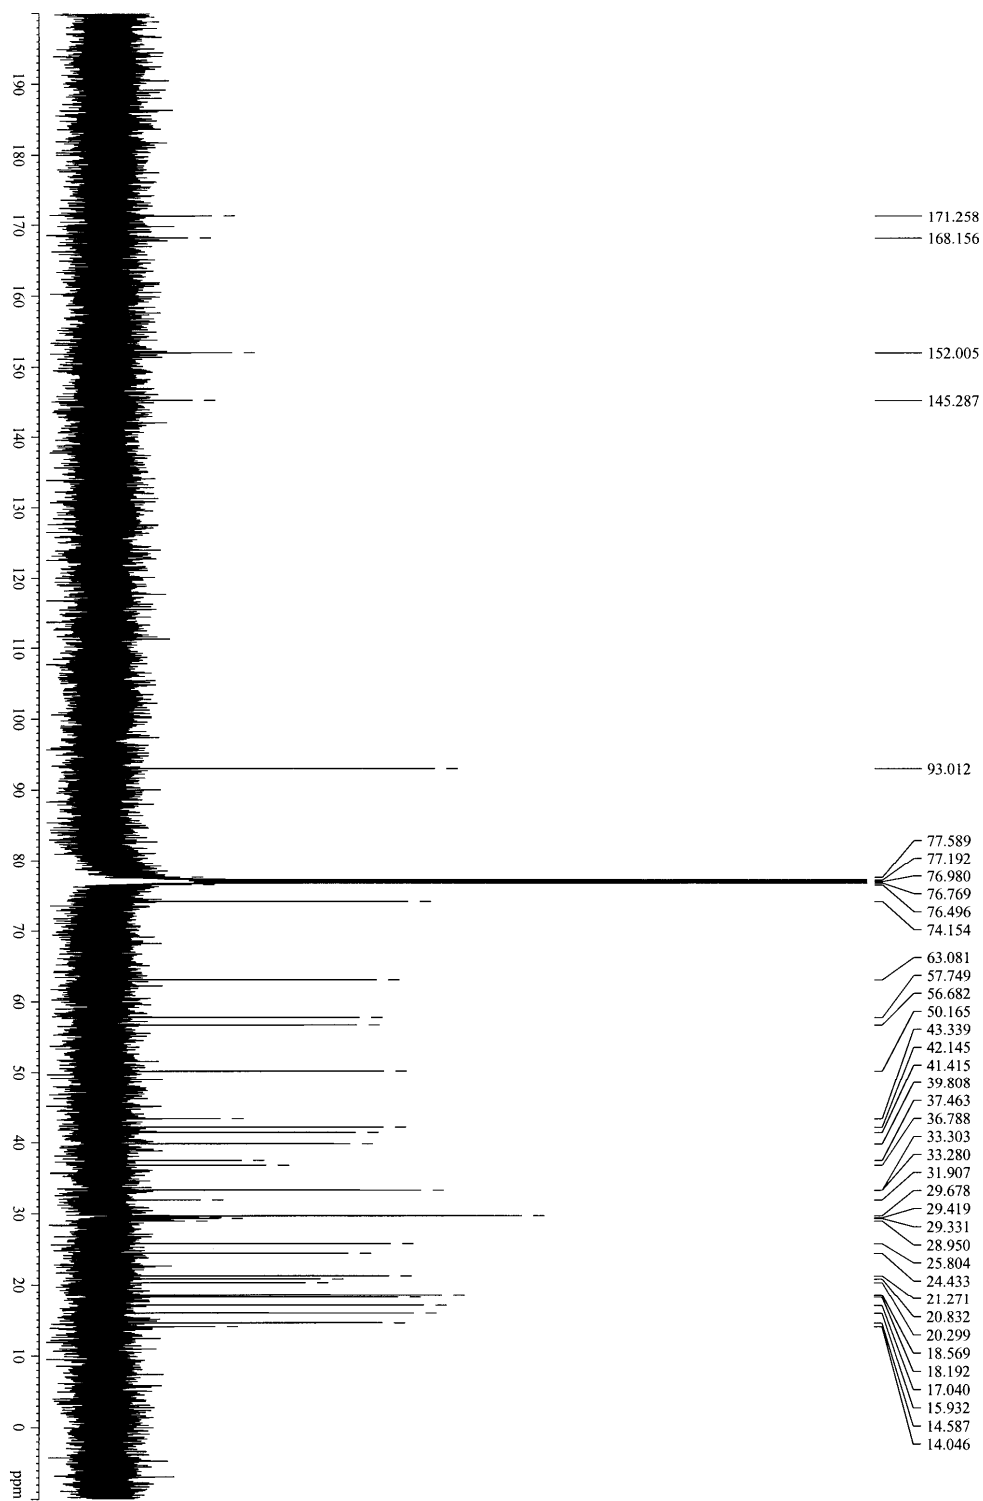

Figure S19.  $^{13}\text{C}$  NMR (150 MHz,  $\text{CDCl}_3$ ) of the Compound **4a**

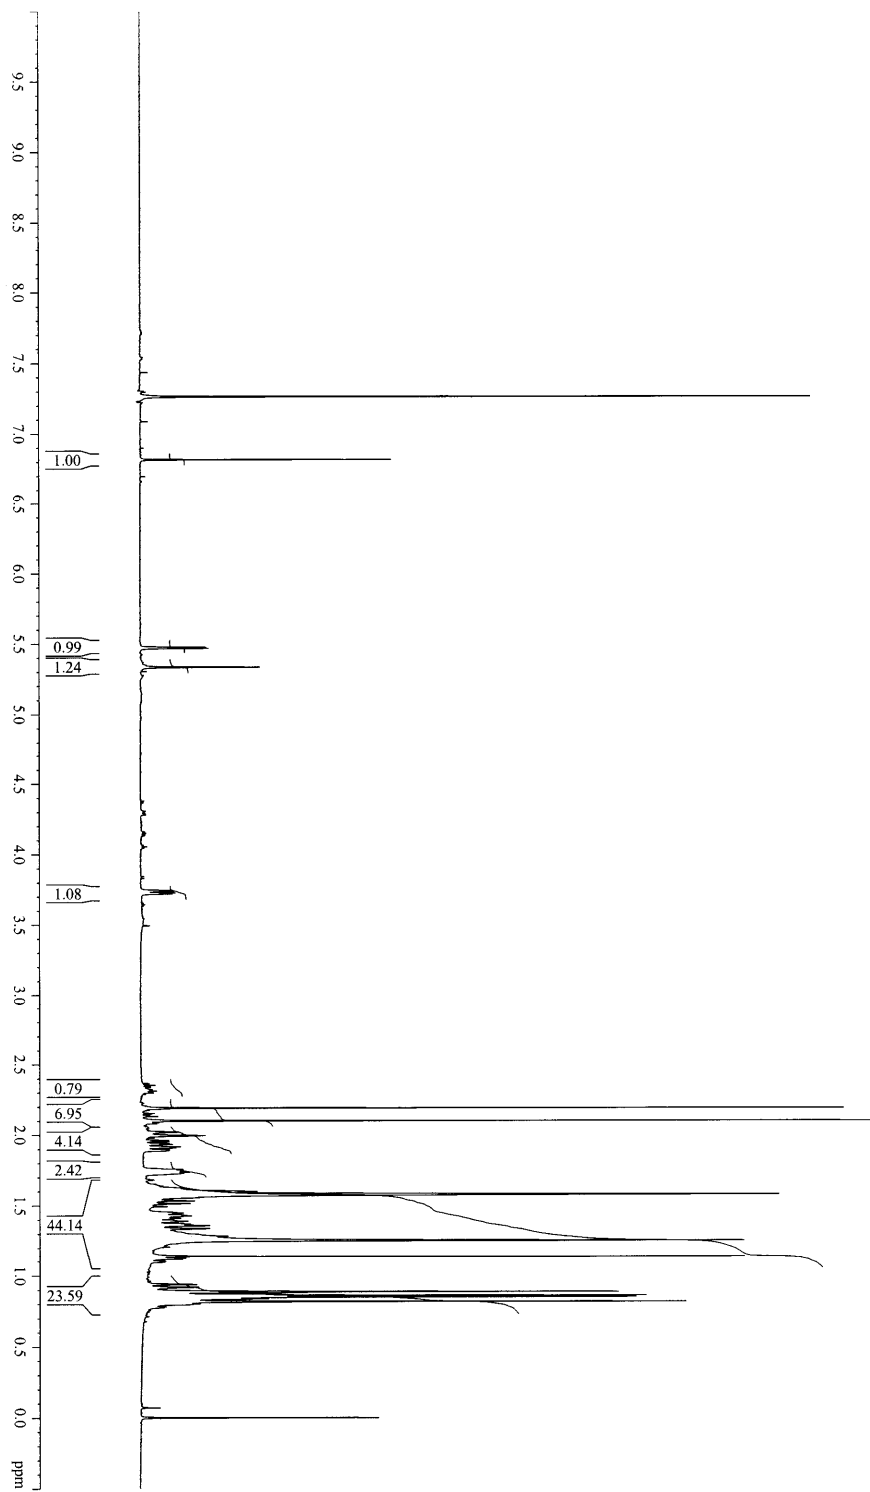

Figure S20.  $^1\text{H}$  NMR (600 MHz,  $\text{CDCl}_3$ ) of the Compound **4b**

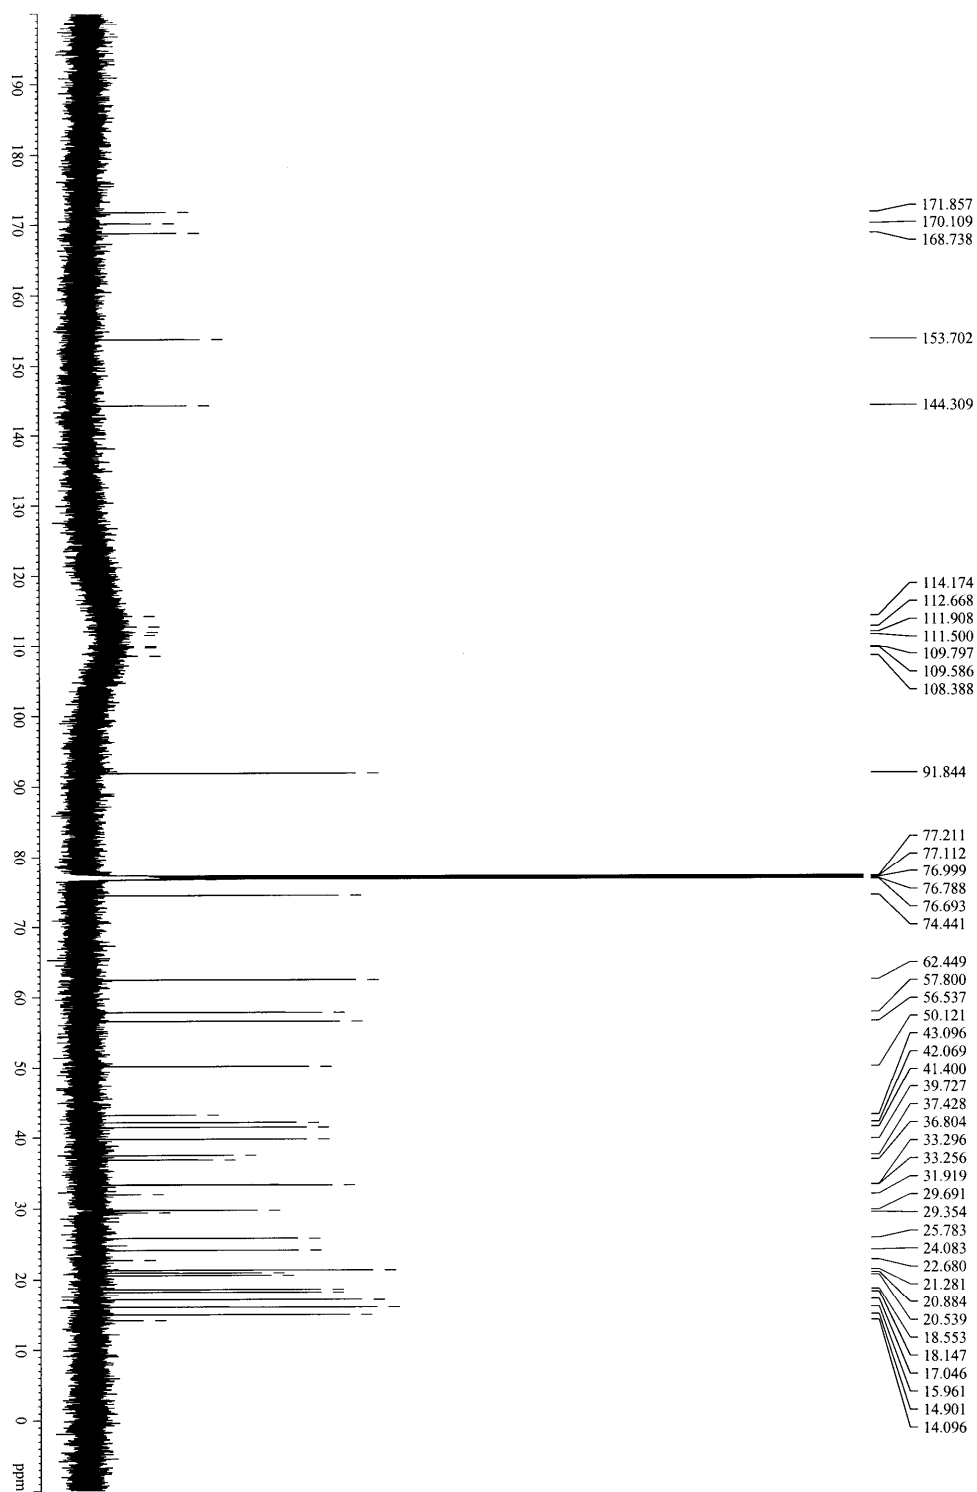

Figure S21.  $^{13}\text{C}$  NMR (150 MHz,  $\text{CDCl}_3$ ) of the Compound **4b**
